# Supplementary material
Source: PubMed Central journal article supplement (PMC6123663)

# Figure1-Source data

## 1D

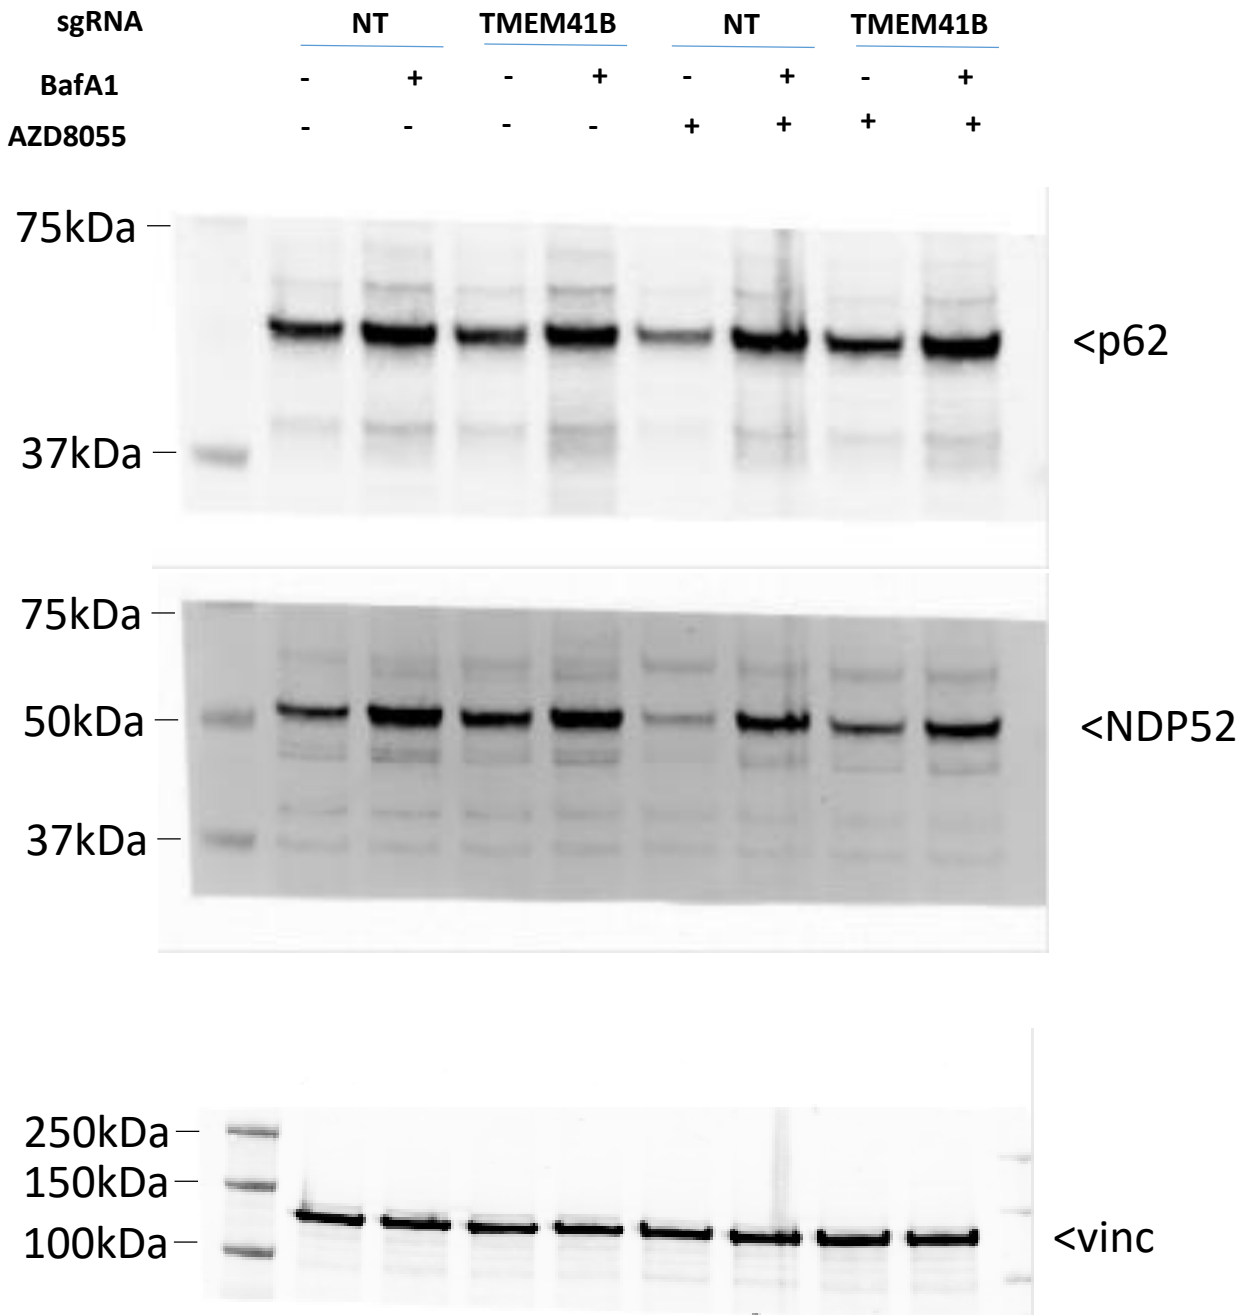

Supplement: EMBR-19-e45889-s004.pdf [file EMBR-19-e45889-s004.pdf]

# Figure 2-Source data

## 2A

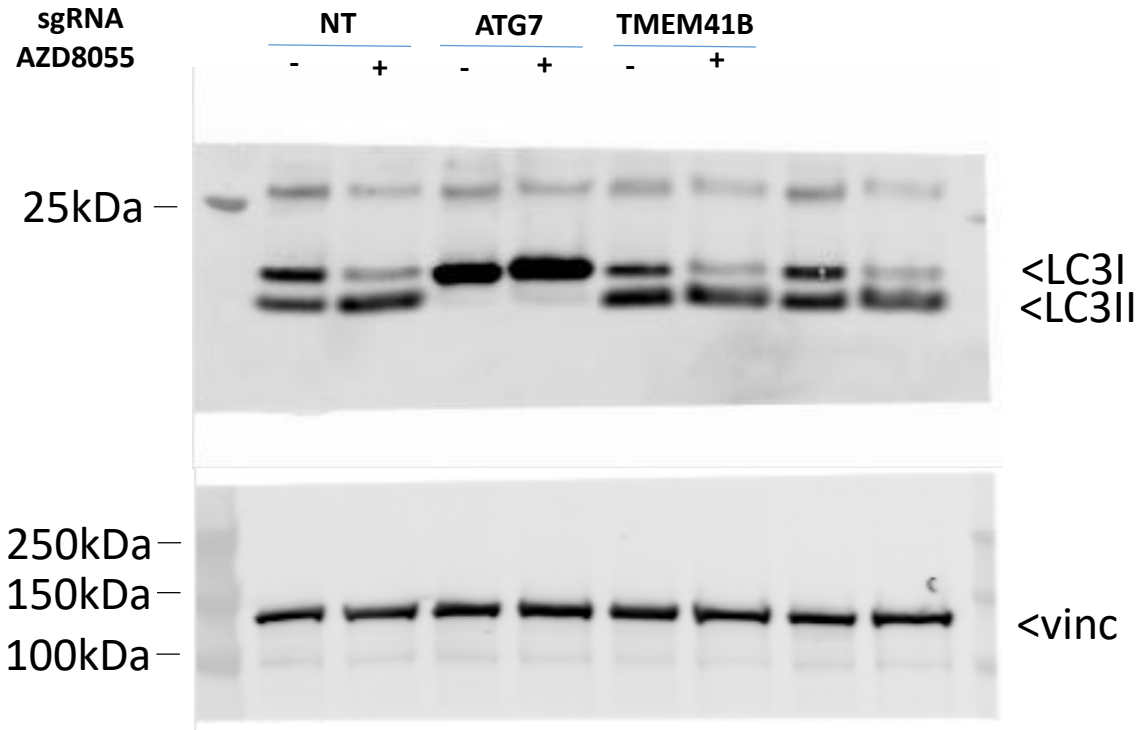

Supplement: EMBR-19-e45889-s005.pdf [file EMBR-19-e45889-s005.pdf]

# Figure 3-Source data

## 3F

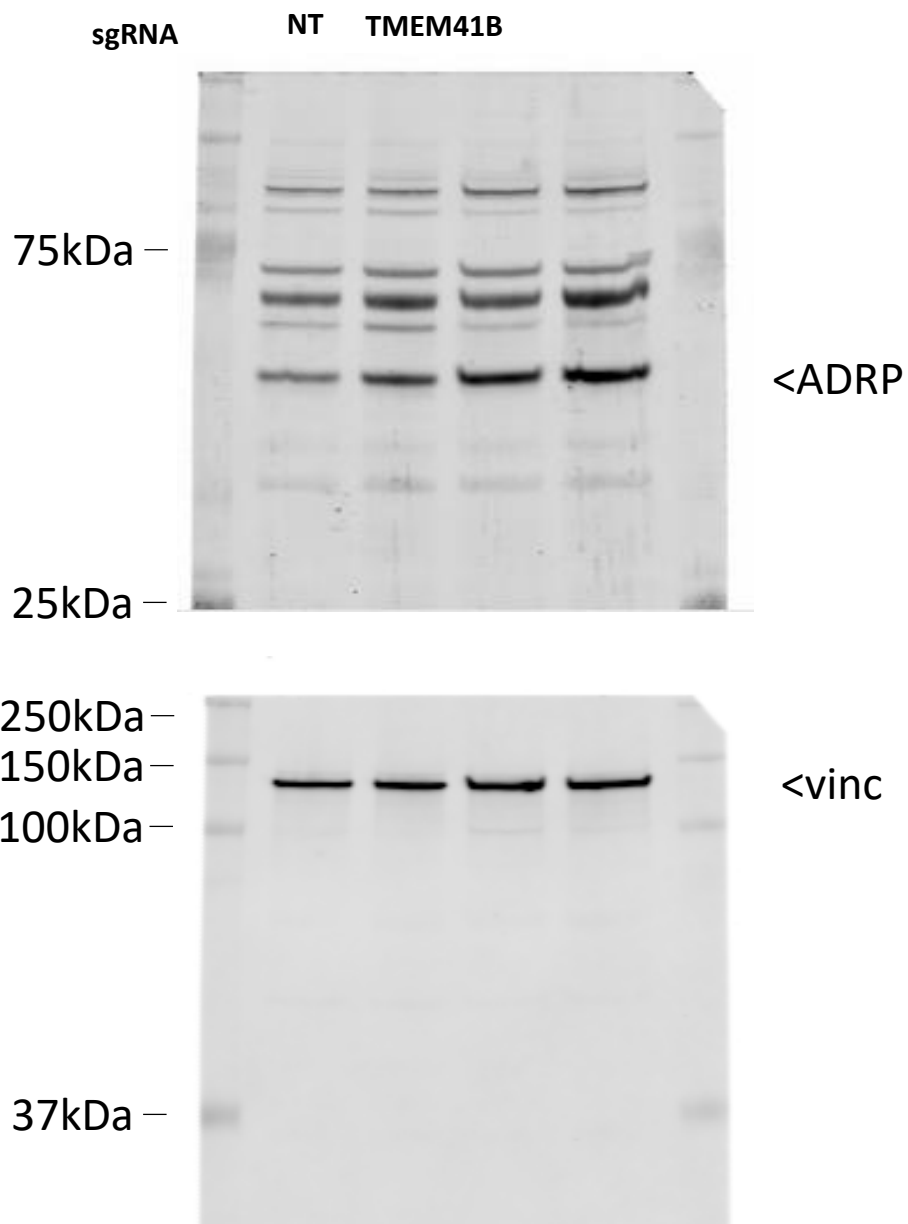

Supplement: EMBR-19-e45889-s006.pdf [file EMBR-19-e45889-s006.pdf]

Figure 5-Source data

5C

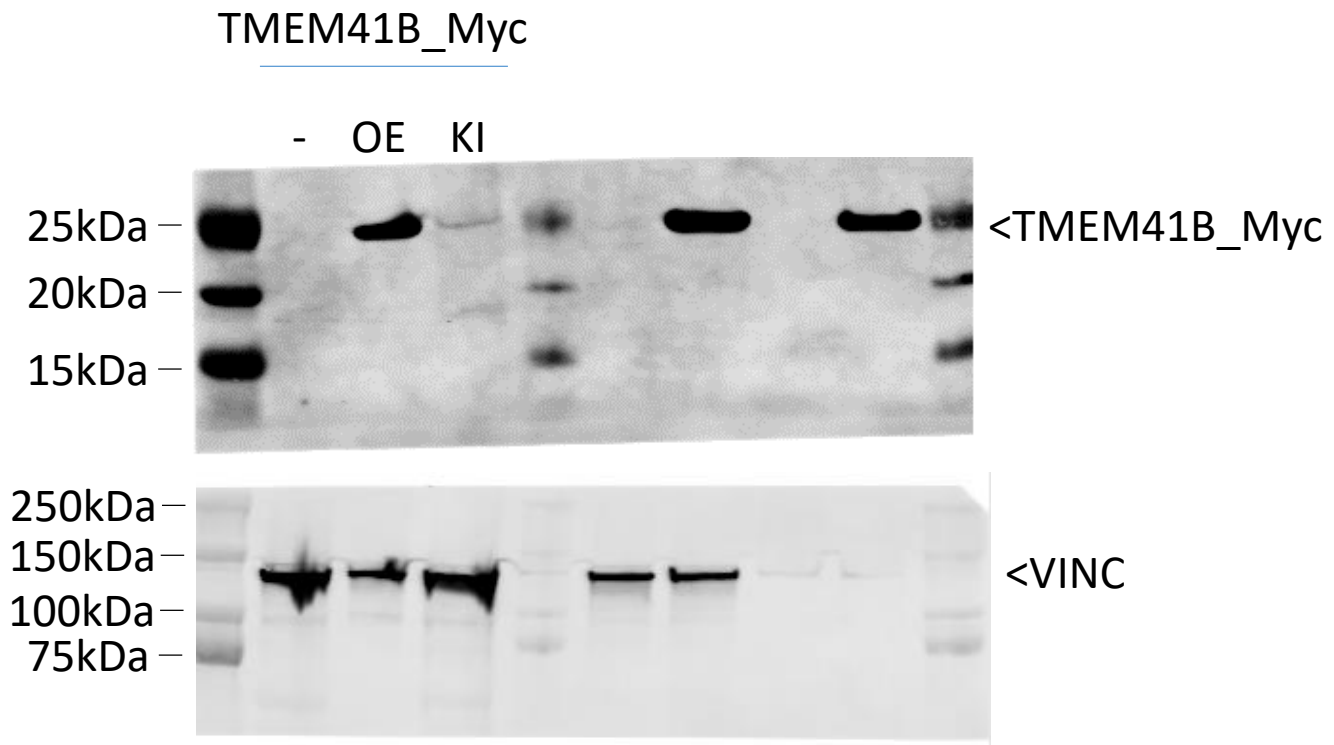

Supplement: EMBR-19-e45889-s007.pdf [file EMBR-19-e45889-s007.pdf]
